# Supplementary material
Source: publisher figshare collection journal article supplement (https://acs.figshare.com/ndownloader/files/3908590)
Supplement: Supplementary file 1 [file 3908590]

  
data_3 
  
_audit_creation_method            SHELXL-97 
_chemical_name_systematic 
; 
 ? 
; 
_chemical_name_common             ? 
_chemical_melting_point           ? 
_chemical_formula_moiety          ? 
_chemical_formula_sum 
 'C31.50 H38 Cl4 Hg N2 O0.50' 
_chemical_formula_weight          795.03 
  
loop_ 
 _atom_type_symbol 
 _atom_type_description 
 _atom_type_scat_dispersion_real 
 _atom_type_scat_dispersion_imag 
 _atom_type_scat_source 
 'C'  'C'   0.0033   0.0016 
 'International Tables Vol C Tables 4.2.6.8 and 6.1.1.4' 
 'H'  'H'   0.0000   0.0000 
 'International Tables Vol C Tables 4.2.6.8 and 6.1.1.4' 
 'N'  'N'   0.0061   0.0033 
 'International Tables Vol C Tables 4.2.6.8 and 6.1.1.4' 
 'O'  'O'   0.0106   0.0060 
 'International Tables Vol C Tables 4.2.6.8 and 6.1.1.4' 
 'Cl'  'Cl'   0.1484   0.1585 
 'International Tables Vol C Tables 4.2.6.8 and 6.1.1.4' 
 'Hg'  'Hg'  -2.3894   9.2266 
 'International Tables Vol C Tables 4.2.6.8 and 6.1.1.4' 
  
_symmetry_cell_setting            Monoclinic 
_symmetry_space_group_name_H-M    P2(1)/c 
  
loop_ 
 _symmetry_equiv_pos_as_xyz 
 'x, y, z' 
 '-x, y+1/2, -z+1/2' 
 '-x, -y, -z' 
 'x, -y-1/2, z-1/2' 
  
_cell_length_a                    9.0210(18) 
_cell_length_b                    11.826(2) 
_cell_length_c                    30.945(6) 
_cell_angle_alpha                 90.00 
_cell_angle_beta                  91.46(3) 
_cell_angle_gamma                 90.00 
_cell_volume                      3300.1(11) 
_cell_formula_units_Z             4 
_cell_measurement_temperature     113(2) 
_cell_measurement_reflns_used     8055 
_cell_measurement_theta_min       1.844 
_cell_measurement_theta_max       27.495 
  
_exptl_crystal_description        ? 
_exptl_crystal_colour             ? 
_exptl_crystal_size_max           0.20 
_exptl_crystal_size_mid           0.18 
_exptl_crystal_size_min           0.12 
_exptl_crystal_density_meas       ? 
_exptl_crystal_density_diffrn     1.600 
_exptl_crystal_density_method     'not measured' 
_exptl_crystal_F_000              1572 
_exptl_absorpt_coefficient_mu     5.012 
_exptl_absorpt_correction_type    MULTI-SCAN 
_exptl_absorpt_correction_T_min   0.4339 
_exptl_absorpt_correction_T_max   0.5846 
_exptl_absorpt_process_details    crystalclear 
  
_exptl_special_details 
; 
 ? 
; 
  
_diffrn_ambient_temperature       113(2) 
_diffrn_radiation_wavelength      0.71073 
_diffrn_radiation_type            MoK\a 
_diffrn_radiation_source          'rotating anode' 
_diffrn_radiation_monochromator   confocal 
_diffrn_measurement_device_type   'rigaku saturn' 
_diffrn_measurement_method        '\w scans' 
_diffrn_detector_area_resol_mean  ? 
_diffrn_standards_number          0 
_diffrn_standards_interval_count  0 
_diffrn_standards_interval_time   0 
_diffrn_standards_decay_%         0 
_diffrn_reflns_number             22889 
_diffrn_reflns_av_R_equivalents   0.1071 
_diffrn_reflns_av_sigmaI/netI     0.0994 
_diffrn_reflns_limit_h_min        -11 
_diffrn_reflns_limit_h_max        11 
_diffrn_reflns_limit_k_min        -15 
_diffrn_reflns_limit_k_max        12 
_diffrn_reflns_limit_l_min        -40 
_diffrn_reflns_limit_l_max        29 
_diffrn_reflns_theta_min          1.84 
_diffrn_reflns_theta_max          27.54 
_reflns_number_total              7553 
_reflns_number_gt                 5456 
_reflns_threshold_expression      >2sigma(I) 
  
_computing_data_collection        'crystalclear' 
_computing_cell_refinement        'crystalclear' 
_computing_data_reduction         'crystalclear' 
_computing_structure_solution     'SHELXS-97 (Sheldrick, 1990)' 
_computing_structure_refinement   'SHELXL-97 (Sheldrick, 1997)' 
_computing_molecular_graphics     'Bruker SHELXTL' 
_computing_publication_material   'Bruker SHELXTL' 
  
_refine_special_details 
; 
 Refinement of F^2^ against ALL reflections.  The weighted R-factor wR and 
 goodness of fit S are based on F^2^, conventional R-factors R are based 
 on F, with F set to zero for negative F^2^. The threshold expression of 
 F^2^ > 2sigma(F^2^) is used only for calculating R-factors(gt) etc. and is 
 not relevant to the choice of reflections for refinement.  R-factors based 
 on F^2^ are statistically about twice as large as those based on F, and R- 
 factors based on ALL data will be even larger. 
; 
  
_refine_ls_structure_factor_coef  Fsqd 
_refine_ls_matrix_type            full 
_refine_ls_weighting_scheme       calc 
_refine_ls_weighting_details 
 'calc w=1/[\s^2^(Fo^2^)+(0.1030P)^2^+0.0000P] where P=(Fo^2^+2Fc^2^)/3' 
_atom_sites_solution_primary      direct 
_atom_sites_solution_secondary    difmap 
_atom_sites_solution_hydrogens    geom 
_refine_ls_hydrogen_treatment     CONSTR 
_refine_ls_extinction_method      none 
_refine_ls_extinction_coef        ? 
_refine_ls_number_reflns          7553 
_refine_ls_number_parameters      407 
_refine_ls_number_restraints      66 
_refine_ls_R_factor_all           0.0938 
_refine_ls_R_factor_gt            0.0685 
_refine_ls_wR_factor_ref          0.2031 
_refine_ls_wR_factor_gt           0.1835 
_refine_ls_goodness_of_fit_ref    1.021 
_refine_ls_restrained_S_all       1.046 
_refine_ls_shift/su_max           0.001 
_refine_ls_shift/su_mean          0.000 
  
loop_ 
 _atom_site_label 
 _atom_site_type_symbol 
 _atom_site_fract_x 
 _atom_site_fract_y 
 _atom_site_fract_z 
 _atom_site_U_iso_or_equiv 
 _atom_site_adp_type 
 _atom_site_occupancy 
 _atom_site_symmetry_multiplicity 
 _atom_site_calc_flag 
 _atom_site_refinement_flags 
 _atom_site_disorder_assembly 
 _atom_site_disorder_group 
N1 N 0.2015(7) 0.8639(6) 0.9088(2) 0.0569(16) Uani 1 1 d . A 1 
H1 H 0.2922 0.8939 0.9154 0.068 Uiso 1 1 calc R A 1 
N2 N 0.3287(6) 1.0544(4) 0.76979(18) 0.0402(12) Uani 1 1 d . A 1 
H2 H 0.2836 1.0985 0.7493 0.048 Uiso 1 1 calc R A 1 
C1 C 0.2207(12) 0.7367(8) 0.9037(3) 0.073(3) Uani 1 1 d . A 1 
H1A H 0.1284 0.7044 0.8927 0.088 Uiso 1 1 calc R A 1 
H1B H 0.2962 0.7223 0.8826 0.088 Uiso 1 1 calc R A 1 
C2 C 0.2640(11) 0.6794(8) 0.9455(4) 0.075(3) Uani 1 1 d . A 1 
C3 C 0.1737(11) 0.6000(7) 0.9627(3) 0.066(2) Uani 1 1 d . A 1 
H3 H 0.0852 0.5814 0.9484 0.079 Uiso 1 1 calc R A 1 
C4 C 0.2109(11) 0.5473(8) 1.0006(4) 0.083(3) Uani 1 1 d . A 1 
H4 H 0.1463 0.4938 1.0116 0.100 Uiso 1 1 calc R A 1 
C5 C 0.3375(13) 0.5700(11) 1.0227(5) 0.118(5) Uani 1 1 d . A 1 
H5 H 0.3612 0.5329 1.0484 0.142 Uiso 1 1 calc R A 1 
C6 C 0.4316(18) 0.6505(15) 1.0059(6) 0.147(6) Uani 1 1 d U A 1 
H6 H 0.5197 0.6689 1.0204 0.176 Uiso 1 1 calc R A 1 
C7 C 0.3937(16) 0.7032(12) 0.9674(5) 0.117(4) Uani 1 1 d U A 1 
H7 H 0.4581 0.7562 0.9561 0.140 Uiso 1 1 calc R A 1 
C8 C 0.1029(9) 0.8920(7) 0.9439(2) 0.0559(19) Uani 1 1 d . A 1 
H8A H 0.1407 0.8577 0.9704 0.067 Uiso 1 1 calc R A 1 
H8B H 0.0055 0.8605 0.9375 0.067 Uiso 1 1 calc R A 1 
C9 C 0.0890(9) 1.0174(7) 0.9504(2) 0.0528(18) Uani 1 1 d . A 1 
C10 C 0.1988(12) 1.0732(11) 0.9723(4) 0.107(5) Uani 1 1 d . A 1 
H10 H 0.2831 1.0354 0.9824 0.129 Uiso 1 1 calc R A 1 
C11 C 0.1807(19) 1.1947(12) 0.9795(5) 0.122(5) Uani 1 1 d U A 1 
H11 H 0.2526 1.2354 0.9949 0.147 Uiso 1 1 calc R A 1 
C12 C 0.061(2) 1.2455(13) 0.9638(5) 0.118(5) Uani 1 1 d U A 1 
H12 H 0.0589 1.3240 0.9654 0.142 Uiso 1 1 calc R A 1 
C13 C -0.0567(18) 1.1953(11) 0.9458(4) 0.103(4) Uani 1 1 d U A 1 
H13 H -0.1431 1.2348 0.9386 0.124 Uiso 1 1 calc R A 1 
C14 C -0.0421(13) 1.0751(9) 0.9380(3) 0.077(3) Uani 1 1 d . A 1 
H14 H -0.1199 1.0355 0.9248 0.092 Uiso 1 1 calc R A 1 
C15 C 0.1478(9) 0.9147(9) 0.8655(2) 0.060(2) Uani 1 1 d . A 1 
H15A H 0.0870 0.8594 0.8501 0.072 Uiso 1 1 calc R A 1 
H15B H 0.0861 0.9800 0.8711 0.072 Uiso 1 1 calc R A 1 
C16 C 0.2701(8) 0.9495(7) 0.8377(3) 0.055(2) Uani 1 1 d . A 1 
H16A H 0.3218 0.8831 0.8275 0.066 Uiso 1 1 calc R A 1 
H16B H 0.3402 0.9956 0.8542 0.066 Uiso 1 1 calc R A 1 
C17 C 0.2101(7) 1.0159(5) 0.7997(2) 0.0385(14) Uani 1 1 d . A 1 
H17A H 0.1395 0.9694 0.7835 0.046 Uiso 1 1 calc R A 1 
H17B H 0.1576 1.0815 0.8101 0.046 Uiso 1 1 calc R A 1 
C18 C 0.4457(9) 1.1254(7) 0.7915(3) 0.0542(19) Uani 1 1 d . A 1 
H18A H 0.5131 1.1528 0.7699 0.065 Uiso 1 1 calc R A 1 
H18B H 0.5023 1.0789 0.8118 0.065 Uiso 1 1 calc R A 1 
C19 C 0.3829(13) 1.2243(8) 0.8151(3) 0.076(3) Uani 1 1 d . A 1 
C20 C 0.4009(18) 1.2362(11) 0.8593(4) 0.108(4) Uani 1 1 d U A 1 
H20 H 0.4514 1.1830 0.8763 0.130 Uiso 1 1 calc R A 1 
C21 C 0.336(2) 1.3373(15) 0.8777(5) 0.127(5) Uani 1 1 d U A 1 
H21 H 0.3446 1.3486 0.9074 0.152 Uiso 1 1 calc R A 1 
C22 C 0.2649(19) 1.4134(14) 0.8542(5) 0.126(5) Uani 1 1 d U A 1 
H22 H 0.2198 1.4739 0.8678 0.151 Uiso 1 1 calc R A 1 
C23 C 0.2564(16) 1.4061(11) 0.8120(5) 0.114(4) Uani 1 1 d U A 1 
H23 H 0.2123 1.4622 0.7950 0.137 Uiso 1 1 calc R A 1 
C24 C 0.3175(15) 1.3091(8) 0.7940(4) 0.092(4) Uani 1 1 d . A 1 
H24 H 0.3117 1.3032 0.7640 0.110 Uiso 1 1 calc R A 1 
C25 C 0.4037(7) 0.9583(5) 0.7462(2) 0.0423(15) Uani 1 1 d . A 1 
H25A H 0.4839 0.9891 0.7295 0.051 Uiso 1 1 calc R A 1 
H25B H 0.4467 0.9066 0.7674 0.051 Uiso 1 1 calc R A 1 
C26 C 0.3024(7) 0.8940(5) 0.7167(2) 0.0420(15) Uani 1 1 d . A 1 
C27 C 0.2360(8) 0.7939(6) 0.7305(3) 0.0473(16) Uani 1 1 d . A 1 
H27 H 0.2560 0.7669 0.7583 0.057 Uiso 1 1 calc R A 1 
C28 C 0.1411(8) 0.7352(7) 0.7031(3) 0.0517(18) Uani 1 1 d . A 1 
H28 H 0.0983 0.6682 0.7124 0.062 Uiso 1 1 calc R A 1 
C29 C 0.1095(10) 0.7748(7) 0.6623(3) 0.061(2) Uani 1 1 d . A 1 
H29 H 0.0435 0.7356 0.6442 0.073 Uiso 1 1 calc R A 1 
C30 C 0.1755(10) 0.8728(8) 0.6480(3) 0.061(2) Uani 1 1 d . A 1 
H30 H 0.1556 0.8988 0.6201 0.073 Uiso 1 1 calc R A 1 
C31 C 0.2700(9) 0.9317(6) 0.6749(2) 0.0496(17) Uani 1 1 d . A 1 
H31 H 0.3133 0.9980 0.6651 0.060 Uiso 1 1 calc R A 1 
Hg1 Hg 0.67530(4) 0.80928(3) 0.865984(13) 0.04318(19) Uani 0.6867(11) 1 d PU B 1 
Cl1 Cl 0.4927(11) 0.6947(7) 0.8208(3) 0.046(3) Uani 0.6867(11) 1 d P B 1 
Cl2 Cl 0.8287(9) 0.6771(7) 0.9072(2) 0.0722(18) Uani 0.6867(11) 1 d P B 1 
Cl3 Cl 0.8132(3) 0.9217(2) 0.81170(9) 0.0479(6) Uani 0.6867(11) 1 d P B 1 
Cl4 Cl 0.5498(3) 0.9459(2) 0.91638(9) 0.0516(6) Uani 0.6867(11) 1 d P B 1 
Hg1' Hg 0.73082(9) 0.74644(7) 0.85039(3) 0.0397(3) Uani 0.3133(11) 1 d PU B 2 
Cl1' Cl 0.490(2) 0.6998(15) 0.8198(6) 0.041(6) Uani 0.3133(11) 1 d P B 2 
Cl2' Cl 0.789(2) 0.6830(16) 0.9227(5) 0.068(4) Uani 0.3133(11) 1 d P B 2 
Cl3' Cl 0.7237(6) 0.9585(4) 0.84907(19) 0.0491(13) Uani 0.3133(11) 1 d P B 2 
Cl4' Cl 0.9168(8) 0.6755(6) 0.7991(3) 0.0482(15) Uani 0.3133(11) 1 d P B 2 
C32 C 0.9951(17) 0.6219(13) 0.7999(5) 0.047(3) Uani 0.50 1 d PU C 3 
O1 O 0.8786(11) 0.6708(8) 0.7778(4) 0.034(2) Uani 0.50 1 d P C 3 
  
loop_ 
 _atom_site_aniso_label 
 _atom_site_aniso_U_11 
 _atom_site_aniso_U_22 
 _atom_site_aniso_U_33 
 _atom_site_aniso_U_23 
 _atom_site_aniso_U_13 
 _atom_site_aniso_U_12 
N1 0.052(4) 0.074(5) 0.044(4) 0.010(3) 0.010(3) 0.001(3) 
N2 0.044(3) 0.034(3) 0.042(3) 0.004(2) -0.001(2) -0.004(2) 
C1 0.083(7) 0.078(6) 0.061(6) 0.010(5) 0.031(5) 0.019(5) 
C2 0.052(5) 0.079(6) 0.096(8) 0.019(5) 0.033(5) 0.015(4) 
C3 0.069(5) 0.059(5) 0.070(6) 0.008(4) 0.021(4) 0.014(4) 
C4 0.059(5) 0.067(6) 0.125(9) 0.034(6) 0.029(6) 0.011(5) 
C5 0.070(7) 0.127(10) 0.158(12) 0.094(9) -0.008(7) -0.005(7) 
C6 0.117(9) 0.156(9) 0.165(9) 0.067(8) -0.028(7) -0.014(8) 
C7 0.092(7) 0.126(8) 0.134(8) 0.059(7) 0.002(6) -0.007(6) 
C8 0.062(5) 0.060(5) 0.046(4) 0.003(4) 0.018(4) -0.011(4) 
C9 0.063(5) 0.053(4) 0.042(4) 0.006(3) 0.006(3) -0.018(4) 
C10 0.072(7) 0.122(10) 0.130(10) -0.060(8) 0.030(7) -0.055(7) 
C11 0.118(8) 0.117(8) 0.134(9) -0.037(7) 0.033(7) -0.065(7) 
C12 0.149(9) 0.094(7) 0.114(8) 0.017(6) 0.043(7) -0.032(7) 
C13 0.133(8) 0.104(7) 0.074(6) 0.020(5) 0.035(6) 0.032(6) 
C14 0.104(8) 0.080(7) 0.047(5) 0.006(5) 0.007(5) -0.006(6) 
C15 0.053(4) 0.086(6) 0.042(4) 0.013(4) 0.008(3) 0.004(4) 
C16 0.045(4) 0.055(4) 0.066(5) 0.028(4) 0.004(3) 0.003(3) 
C17 0.041(3) 0.031(3) 0.043(4) 0.006(3) 0.005(3) -0.003(2) 
C18 0.058(4) 0.053(4) 0.051(5) -0.009(3) 0.007(3) -0.021(4) 
C19 0.119(9) 0.060(5) 0.050(5) -0.008(4) 0.032(5) -0.048(6) 
C20 0.151(9) 0.090(7) 0.083(7) -0.012(6) 0.013(6) -0.042(6) 
C21 0.154(9) 0.149(9) 0.078(7) -0.028(7) 0.025(7) -0.013(8) 
C22 0.150(9) 0.105(8) 0.124(9) -0.009(7) 0.029(7) -0.027(7) 
C23 0.146(8) 0.083(6) 0.116(8) -0.021(6) 0.047(7) -0.015(6) 
C24 0.119(10) 0.047(5) 0.113(9) -0.030(5) 0.058(8) -0.020(5) 
C25 0.042(3) 0.038(3) 0.047(4) 0.005(3) 0.009(3) -0.004(3) 
C26 0.037(3) 0.032(3) 0.057(4) 0.002(3) 0.005(3) 0.000(2) 
C27 0.046(4) 0.042(4) 0.054(5) 0.005(3) 0.003(3) 0.000(3) 
C28 0.046(4) 0.054(4) 0.055(5) -0.007(4) 0.012(3) -0.010(3) 
C29 0.067(5) 0.069(5) 0.046(5) -0.017(4) 0.007(4) -0.022(4) 
C30 0.073(5) 0.074(6) 0.037(4) -0.002(4) 0.004(4) -0.020(4) 
C31 0.064(5) 0.046(4) 0.039(4) 0.002(3) 0.006(3) -0.008(3) 
Hg1 0.0392(3) 0.0432(3) 0.0471(3) -0.00088(17) -0.00100(18) -0.00129(16) 
Cl1 0.040(5) 0.049(4) 0.050(5) -0.017(3) 0.006(3) 0.002(3) 
Cl2 0.087(5) 0.054(2) 0.074(5) 0.013(3) -0.033(3) -0.001(3) 
Cl3 0.0427(12) 0.0417(12) 0.0593(16) 0.0044(11) 0.0010(11) -0.0074(10) 
Cl4 0.0540(14) 0.0516(14) 0.0493(15) -0.0067(11) 0.0000(11) -0.0054(11) 
Hg1' 0.0373(5) 0.0425(5) 0.0392(6) -0.0036(4) 0.0011(3) -0.0013(4) 
Cl1' 0.029(8) 0.041(7) 0.051(11) 0.023(6) -0.011(6) 0.003(5) 
Cl2' 0.075(8) 0.065(6) 0.062(9) 0.029(7) -0.022(6) -0.017(6) 
Cl3' 0.054(3) 0.034(2) 0.058(4) 0.002(2) -0.006(3) -0.004(2) 
Cl4' 0.034(3) 0.066(4) 0.046(4) -0.015(3) 0.013(3) -0.005(3) 
C32 0.039(6) 0.048(6) 0.054(7) 0.008(6) 0.002(5) -0.015(6) 
O1 0.033(5) 0.044(5) 0.024(5) -0.011(4) -0.002(4) -0.008(4) 
  
_geom_special_details 
; 
 All esds (except the esd in the dihedral angle between two l.s. planes) 
 are estimated using the full covariance matrix.  The cell esds are taken 
 into account individually in the estimation of esds in distances, angles 
 and torsion angles; correlations between esds in cell parameters are only 
 used when they are defined by crystal symmetry.  An approximate (isotropic) 
 treatment of cell esds is used for estimating esds involving l.s. planes. 
; 
  
loop_ 
 _geom_bond_atom_site_label_1 
 _geom_bond_atom_site_label_2 
 _geom_bond_distance 
 _geom_bond_site_symmetry_2 
 _geom_bond_publ_flag 
N1 C8 1.460(9) . ? 
N1 C1 1.522(12) . ? 
N1 C15 1.536(10) . ? 
N1 H1 0.9100 . ? 
N2 C18 1.494(9) . ? 
N2 C17 1.502(8) . ? 
N2 C25 1.519(8) . ? 
N2 H2 0.9100 . ? 
C1 C2 1.505(14) . ? 
C1 H1A 0.9700 . ? 
C1 H1B 0.9700 . ? 
C2 C3 1.361(12) . ? 
C2 C7 1.366(18) . ? 
C3 C4 1.362(13) . ? 
C3 H3 0.9300 . ? 
C4 C5 1.343(16) . ? 
C4 H4 0.9300 . ? 
C5 C6 1.385(18) . ? 
C5 H5 0.9300 . ? 
C6 C7 1.379(19) . ? 
C6 H6 0.9300 . ? 
C7 H7 0.9300 . ? 
C8 C9 1.503(11) . ? 
C8 H8A 0.9700 . ? 
C8 H8B 0.9700 . ? 
C9 C10 1.357(12) . ? 
C9 C14 1.410(13) . ? 
C10 C11 1.463(18) . ? 
C10 H10 0.9300 . ? 
C11 C12 1.32(2) . ? 
C11 H11 0.9300 . ? 
C12 C13 1.33(2) . ? 
C12 H12 0.9300 . ? 
C13 C14 1.449(15) . ? 
C13 H13 0.9300 . ? 
C14 H14 0.9300 . ? 
C15 C16 1.475(10) . ? 
C15 H15A 0.9700 . ? 
C15 H15B 0.9700 . ? 
C16 C17 1.503(9) . ? 
C16 H16A 0.9700 . ? 
C16 H16B 0.9700 . ? 
C17 H17A 0.9700 . ? 
C17 H17B 0.9700 . ? 
C18 C19 1.497(13) . ? 
C18 H18A 0.9700 . ? 
C18 H18B 0.9700 . ? 
C19 C24 1.326(17) . ? 
C19 C20 1.383(15) . ? 
C20 C21 1.45(2) . ? 
C20 H20 0.9300 . ? 
C21 C22 1.31(2) . ? 
C21 H21 0.9300 . ? 
C22 C23 1.309(17) . ? 
C22 H22 0.9300 . ? 
C23 C24 1.394(14) . ? 
C23 H23 0.9300 . ? 
C24 H24 0.9300 . ? 
C25 C26 1.485(9) . ? 
C25 H25A 0.9700 . ? 
C25 H25B 0.9700 . ? 
C26 C31 1.392(10) . ? 
C26 C27 1.399(9) . ? 
C27 C28 1.377(11) . ? 
C27 H27 0.9300 . ? 
C28 C29 1.371(12) . ? 
C28 H28 0.9300 . ? 
C29 C30 1.381(11) . ? 
C29 H29 0.9300 . ? 
C30 C31 1.367(11) . ? 
C30 H30 0.9300 . ? 
C31 H31 0.9300 . ? 
Hg1 Cl2 2.428(9) . ? 
Hg1 Cl3 2.498(3) . ? 
Hg1 Cl1 2.527(10) . ? 
Hg1 Cl4 2.532(3) . ? 
Hg1' Cl2' 2.406(16) . ? 
Hg1' Cl1' 2.42(2) . ? 
Hg1' Cl4' 2.483(6) . ? 
Hg1' Cl3' 2.509(5) . ? 
C32 O1 1.367(18) . ? 
  
loop_ 
 _geom_angle_atom_site_label_1 
 _geom_angle_atom_site_label_2 
 _geom_angle_atom_site_label_3 
 _geom_angle 
 _geom_angle_site_symmetry_1 
 _geom_angle_site_symmetry_3 
 _geom_angle_publ_flag 
C8 N1 C1 112.0(6) . . ? 
C8 N1 C15 112.1(6) . . ? 
C1 N1 C15 109.3(7) . . ? 
C8 N1 H1 107.7 . . ? 
C1 N1 H1 107.7 . . ? 
C15 N1 H1 107.7 . . ? 
C18 N2 C17 113.6(5) . . ? 
C18 N2 C25 108.6(5) . . ? 
C17 N2 C25 113.7(5) . . ? 
C18 N2 H2 106.9 . . ? 
C17 N2 H2 106.9 . . ? 
C25 N2 H2 106.9 . . ? 
C2 C1 N1 112.5(8) . . ? 
C2 C1 H1A 109.1 . . ? 
N1 C1 H1A 109.1 . . ? 
C2 C1 H1B 109.1 . . ? 
N1 C1 H1B 109.1 . . ? 
H1A C1 H1B 107.8 . . ? 
C3 C2 C7 117.5(11) . . ? 
C3 C2 C1 120.1(10) . . ? 
C7 C2 C1 122.3(10) . . ? 
C2 C3 C4 121.0(10) . . ? 
C2 C3 H3 119.5 . . ? 
C4 C3 H3 119.5 . . ? 
C5 C4 C3 122.3(9) . . ? 
C5 C4 H4 118.9 . . ? 
C3 C4 H4 118.9 . . ? 
C4 C5 C6 117.9(12) . . ? 
C4 C5 H5 121.1 . . ? 
C6 C5 H5 121.1 . . ? 
C7 C6 C5 119.6(15) . . ? 
C7 C6 H6 120.2 . . ? 
C5 C6 H6 120.2 . . ? 
C2 C7 C6 121.7(13) . . ? 
C2 C7 H7 119.2 . . ? 
C6 C7 H7 119.2 . . ? 
N1 C8 C9 112.3(6) . . ? 
N1 C8 H8A 109.1 . . ? 
C9 C8 H8A 109.1 . . ? 
N1 C8 H8B 109.1 . . ? 
C9 C8 H8B 109.1 . . ? 
H8A C8 H8B 107.9 . . ? 
C10 C9 C14 119.8(10) . . ? 
C10 C9 C8 119.0(10) . . ? 
C14 C9 C8 120.9(8) . . ? 
C9 C10 C11 118.1(14) . . ? 
C9 C10 H10 121.0 . . ? 
C11 C10 H10 121.0 . . ? 
C12 C11 C10 119.0(14) . . ? 
C12 C11 H11 120.5 . . ? 
C10 C11 H11 120.5 . . ? 
C11 C12 C13 126.2(15) . . ? 
C11 C12 H12 116.9 . . ? 
C13 C12 H12 116.9 . . ? 
C12 C13 C14 115.7(14) . . ? 
C12 C13 H13 122.2 . . ? 
C14 C13 H13 122.2 . . ? 
C9 C14 C13 120.6(12) . . ? 
C9 C14 H14 119.7 . . ? 
C13 C14 H14 119.7 . . ? 
C16 C15 N1 113.3(7) . . ? 
C16 C15 H15A 108.9 . . ? 
N1 C15 H15A 108.9 . . ? 
C16 C15 H15B 108.9 . . ? 
N1 C15 H15B 108.9 . . ? 
H15A C15 H15B 107.7 . . ? 
C15 C16 C17 110.1(6) . . ? 
C15 C16 H16A 109.6 . . ? 
C17 C16 H16A 109.6 . . ? 
C15 C16 H16B 109.6 . . ? 
C17 C16 H16B 109.6 . . ? 
H16A C16 H16B 108.2 . . ? 
N2 C17 C16 113.1(5) . . ? 
N2 C17 H17A 109.0 . . ? 
C16 C17 H17A 109.0 . . ? 
N2 C17 H17B 109.0 . . ? 
C16 C17 H17B 109.0 . . ? 
H17A C17 H17B 107.8 . . ? 
N2 C18 C19 112.7(7) . . ? 
N2 C18 H18A 109.0 . . ? 
C19 C18 H18A 109.0 . . ? 
N2 C18 H18B 109.0 . . ? 
C19 C18 H18B 109.0 . . ? 
H18A C18 H18B 107.8 . . ? 
C24 C19 C20 116.7(11) . . ? 
C24 C19 C18 121.3(9) . . ? 
C20 C19 C18 121.8(12) . . ? 
C19 C20 C21 115.6(14) . . ? 
C19 C20 H20 122.2 . . ? 
C21 C20 H20 122.2 . . ? 
C22 C21 C20 122.9(14) . . ? 
C22 C21 H21 118.5 . . ? 
C20 C21 H21 118.5 . . ? 
C23 C22 C21 121.5(17) . . ? 
C23 C22 H22 119.3 . . ? 
C21 C22 H22 119.3 . . ? 
C22 C23 C24 116.0(16) . . ? 
C22 C23 H23 122.0 . . ? 
C24 C23 H23 122.0 . . ? 
C19 C24 C23 127.0(13) . . ? 
C19 C24 H24 116.5 . . ? 
C23 C24 H24 116.5 . . ? 
C26 C25 N2 113.9(5) . . ? 
C26 C25 H25A 108.8 . . ? 
N2 C25 H25A 108.8 . . ? 
C26 C25 H25B 108.8 . . ? 
N2 C25 H25B 108.8 . . ? 
H25A C25 H25B 107.7 . . ? 
C31 C26 C27 118.3(7) . . ? 
C31 C26 C25 121.3(6) . . ? 
C27 C26 C25 120.5(7) . . ? 
C28 C27 C26 120.1(7) . . ? 
C28 C27 H27 119.9 . . ? 
C26 C27 H27 119.9 . . ? 
C29 C28 C27 120.5(7) . . ? 
C29 C28 H28 119.8 . . ? 
C27 C28 H28 119.8 . . ? 
C28 C29 C30 120.0(8) . . ? 
C28 C29 H29 120.0 . . ? 
C30 C29 H29 120.0 . . ? 
C31 C30 C29 119.9(8) . . ? 
C31 C30 H30 120.0 . . ? 
C29 C30 H30 120.0 . . ? 
C30 C31 C26 121.1(7) . . ? 
C30 C31 H31 119.5 . . ? 
C26 C31 H31 119.5 . . ? 
Cl2 Hg1 Cl3 114.13(18) . . ? 
Cl2 Hg1 Cl1 107.5(3) . . ? 
Cl3 Hg1 Cl1 104.0(2) . . ? 
Cl2 Hg1 Cl4 110.16(18) . . ? 
Cl3 Hg1 Cl4 108.23(9) . . ? 
Cl1 Hg1 Cl4 112.8(2) . . ? 
Cl2' Hg1' Cl1' 117.8(6) . . ? 
Cl2' Hg1' Cl4' 110.7(5) . . ? 
Cl1' Hg1' Cl4' 106.8(5) . . ? 
Cl2' Hg1' Cl3' 109.4(5) . . ? 
Cl1' Hg1' Cl3' 101.5(4) . . ? 
Cl4' Hg1' Cl3' 110.2(2) . . ? 
  
loop_ 
 _geom_torsion_atom_site_label_1 
 _geom_torsion_atom_site_label_2 
 _geom_torsion_atom_site_label_3 
 _geom_torsion_atom_site_label_4 
 _geom_torsion 
 _geom_torsion_site_symmetry_1 
 _geom_torsion_site_symmetry_2 
 _geom_torsion_site_symmetry_3 
 _geom_torsion_site_symmetry_4 
 _geom_torsion_publ_flag 
C8 N1 C1 C2 -51.6(10) . . . . ? 
C15 N1 C1 C2 -176.4(7) . . . . ? 
N1 C1 C2 C3 118.2(10) . . . . ? 
N1 C1 C2 C7 -62.4(14) . . . . ? 
C7 C2 C3 C4 0.7(15) . . . . ? 
C1 C2 C3 C4 -179.9(8) . . . . ? 
C2 C3 C4 C5 -0.4(16) . . . . ? 
C3 C4 C5 C6 0(2) . . . . ? 
C4 C5 C6 C7 -1(3) . . . . ? 
C3 C2 C7 C6 -1(2) . . . . ? 
C1 C2 C7 C6 179.6(14) . . . . ? 
C5 C6 C7 C2 1(3) . . . . ? 
C1 N1 C8 C9 177.4(7) . . . . ? 
C15 N1 C8 C9 -59.3(10) . . . . ? 
N1 C8 C9 C10 -79.2(10) . . . . ? 
N1 C8 C9 C14 107.3(9) . . . . ? 
C14 C9 C10 C11 -4.4(15) . . . . ? 
C8 C9 C10 C11 -178.0(9) . . . . ? 
C9 C10 C11 C12 -1(2) . . . . ? 
C10 C11 C12 C13 8(2) . . . . ? 
C11 C12 C13 C14 -8(2) . . . . ? 
C10 C9 C14 C13 4.4(14) . . . . ? 
C8 C9 C14 C13 177.8(8) . . . . ? 
C12 C13 C14 C9 1.7(16) . . . . ? 
C8 N1 C15 C16 145.5(8) . . . . ? 
C1 N1 C15 C16 -89.7(9) . . . . ? 
N1 C15 C16 C17 -170.4(7) . . . . ? 
C18 N2 C17 C16 -57.7(8) . . . . ? 
C25 N2 C17 C16 67.2(7) . . . . ? 
C15 C16 C17 N2 179.9(7) . . . . ? 
C17 N2 C18 C19 -53.6(9) . . . . ? 
C25 N2 C18 C19 178.9(6) . . . . ? 
N2 C18 C19 C24 -67.9(11) . . . . ? 
N2 C18 C19 C20 117.5(10) . . . . ? 
C24 C19 C20 C21 4.3(16) . . . . ? 
C18 C19 C20 C21 179.1(10) . . . . ? 
C19 C20 C21 C22 0(2) . . . . ? 
C20 C21 C22 C23 -4(3) . . . . ? 
C21 C22 C23 C24 4(2) . . . . ? 
C20 C19 C24 C23 -4.3(18) . . . . ? 
C18 C19 C24 C23 -179.2(11) . . . . ? 
C22 C23 C24 C19 0(2) . . . . ? 
C18 N2 C25 C26 -169.2(6) . . . . ? 
C17 N2 C25 C26 63.3(7) . . . . ? 
N2 C25 C26 C31 83.6(8) . . . . ? 
N2 C25 C26 C27 -96.0(7) . . . . ? 
C31 C26 C27 C28 -0.1(10) . . . . ? 
C25 C26 C27 C28 179.4(6) . . . . ? 
C26 C27 C28 C29 -0.8(11) . . . . ? 
C27 C28 C29 C30 1.5(13) . . . . ? 
C28 C29 C30 C31 -1.4(14) . . . . ? 
C29 C30 C31 C26 0.5(13) . . . . ? 
C27 C26 C31 C30 0.2(11) . . . . ? 
C25 C26 C31 C30 -179.3(7) . . . . ? 
  
_diffrn_measured_fraction_theta_max    0.990 
_diffrn_reflns_theta_full              27.54 
_diffrn_measured_fraction_theta_full   0.990 
_refine_diff_density_max    1.414 
_refine_diff_density_min   -1.449 
_refine_diff_density_rms    0.152 
